# Supplementary material for: On-chip pH measurement using functionalized gel-microbeads positioned by optical tweezers
Source: Royal Society of Chemistry journal article supplement (doi:10.1039/b712566f), 2007-11-27
Supplement: b712566f.pdf [file b712566f.pdf]

## Electric Supplementary Information

On-Chip pH Measurement Using Functionalized Gel-Microbeads Positioned by Optical Tweezers

Hisataka Maruyama, Fumihito Arai and Toshio Fukuda

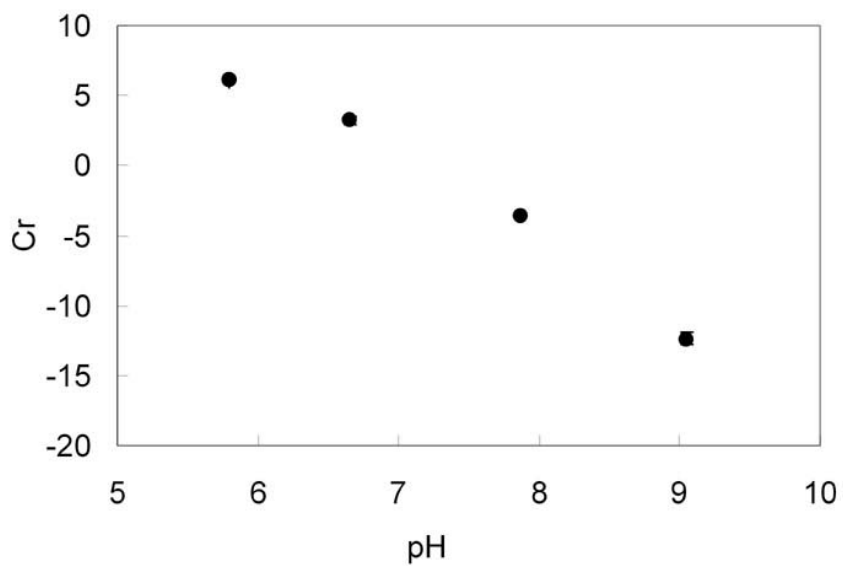

**Fig. S1** Calibration result of pH with Cr.

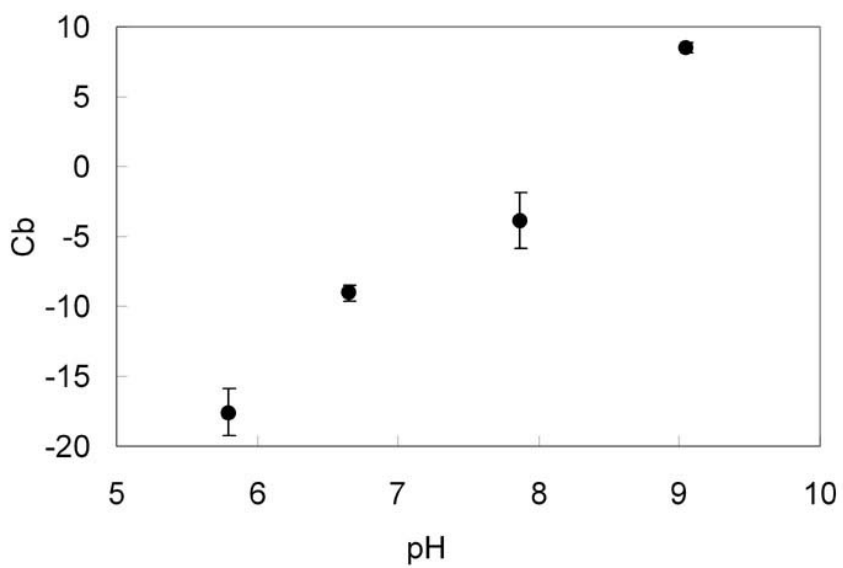

**Fig. S2** Calibration results of pH with Cb.
